# Supplementary material
Source: ML conference proceedings conference paper supplement (https://proceedings.neurips.cc/paper_files/paper/2023/hash/03b1043052700b1a471996b0baf309d4-Abstract.html)
Supplement: Supplementary file 1 [file 03b1043052700b1a471996b0baf309d4-Supplemental-Conference.pdf]

399 **9 Appendix**

400 **9.1 Guarantees for General Agnostic Algorithm**

401 In this section, we give proofs for the guarantees of Algorithm 1. We begin with some definitions,  
402 starting with how empirical loss estimates are made.

403 **Definition 1.** Given a hypothesis  $h \in \mathcal{H}$ , and a set of pairs  $\mathcal{S} = \{(x_i, y_i) : x_i \in \mathcal{X}, y_i \in \mathcal{Y}\}_{i=1}^N$ , let

$$L_{\mathcal{S}}(h) := \frac{1}{N} \left( \sum_{i=1}^N \mathbb{1}[h(x_i) \neq y_i] \right)$$

404 the standard empirical loss of  $h$  on  $\mathcal{S}$ . Let  $L_{\emptyset}(h) := 1$ .

405 The convention to let  $L_{\emptyset}(h) = 1$  allows us to “collapse” the two-part loss estimates in the case the  
406 probability of drawing an unlabeled sample in a specific region is 0; under the specification of the  
407 algorithm,  $\mathcal{S} = \emptyset$  if and only if the probability of a sample falling in the disagreement region or its  
408 complement is 0 under  $D_g$ , in which case we can safely ignore estimation in one of these regions.

409 **Definition 2.** Given a set of classifiers  $\mathcal{H}' \subseteq \mathcal{H}$ , we say “ $\mathcal{H}'$  agrees on a subset  $S \subseteq \mathcal{X}$ ” if for each  
410  $x \in S$  and for each pair  $(h, h') \in \mathcal{H}' \times \mathcal{H}'$ , it holds that  $h(x) = h'(x)$ .

411 We now recall the two-part estimator for the loss of a hypothesis introduced above.

412 **Definition 3.** Fix a group distribution  $D_g$ , some  $\mathcal{H}' \subseteq \mathcal{H}$ , a hypothesis  $h \in \mathcal{H}'$ , and some  $R \subseteq \mathcal{X}$   
413 which is measurable with respect to each marginal of  $D_g$  and for which  $\mathcal{H}'$  agrees on  $R^c$ . Given sets  
414 of pairs  $\mathcal{S}_{R,g}$  and  $\mathcal{S}_{R^c,g}$ , and some arbitrarily chosen classifier  $h_{\mathcal{H}'}$   $\in \mathcal{H}'$ , let

$$L_{\mathcal{S};R}(h | g) := \mathbb{P}_{D_g}(x \in R) \cdot L_{\mathcal{S}_{R,g}}(h) + \mathbb{P}_{D_g}(x \in R^c) \cdot L_{\mathcal{S}_{R^c,g}}(h_{\mathcal{H}'})$$

415 As mentioned in the main body,  $h_{\mathcal{H}'}$  must be used in the estimate of the loss under  $D_g$  in the  
416 “agreement region” for all  $h \in \mathcal{H}$ . The extent to which this estimator is useful can be captured by  
417 standard uniform convergence arguments. To this end, we first introduce a function that will prove to  
418 control its deviations nicely.

419 **Definition 4.** Given a confidence parameter  $\delta \in (0, 1)$ , a group distribution  $D_g \in \mathcal{G}$ , some  $R \subseteq \mathcal{X}$   
420 that is measurable with respect to each marginal  $D_g \in \mathcal{G}$ , and sample sizes  $m, m' > 0$ , define the  
421 function

$$\Gamma_g(\delta, R, m, m') := \begin{cases} \mathbb{P}_{D_g}(x \in R) \left( \frac{1}{m} + \sqrt{\frac{\ln(8/\delta) + d \ln(2em/d)}{m}} \right) + \sqrt{\frac{\ln(4/\delta)}{2m'}} & \text{if } \mathbb{P}_{D_g}(x \in R) > 0, \mathbb{P}_{D_g}(x \in R^c) > 0 \\ \frac{1}{m} + \sqrt{\frac{\ln(8/\delta) + d \ln(2em/d)}{m}} & \text{if } \mathbb{P}_{D_g}(x \in R) > 0, \mathbb{P}_{D_g}(x \in R^c) = 0 \\ \sqrt{\frac{\ln(4/\delta)}{2m'}} & \text{if } \mathbb{P}_{D_g}(x \in R) = 0, \mathbb{P}_{D_g}(x \in R^c) > 0. \end{cases}$$

422 **Lemma 1.** Fix  $\delta \in (0, 1)$ , a set of group distributions  $\mathcal{G}$ , and a group distribution  $D_g \in \mathcal{G}$  arbitrarily.  
423 Further, fix a subset  $R \subseteq \mathcal{X}$  measurable with respect to each marginal of  $D_g \in \mathcal{G}$ , and a set of  
424 classifiers  $\mathcal{H}' \subseteq \mathcal{H}$  with the property that  $\mathcal{H}'$  agree on  $R^c$ . Suppose we query  $m > 0$  unlabeled  
425 samples from  $U_g(R)$ , and  $m' > 0$  samples from  $U_g(R^c)$ . Suppose further that we label the output via  
426 calls to  $O_g(\cdot)$ , forming the labeled samples  $\mathcal{S}_{R,g}$  and  $\mathcal{S}_{R^c,g}$ , respectively; if either  $\mathbb{P}_{D_g}(x \in R) = 0$   
427 or  $\mathbb{P}_{D_g}(x \in R^c)$ , then we set the corresponding sample to be  $\emptyset$ . Then with probability  $\geq 1 - \delta$ , it  
428 holds for all  $h \in \mathcal{H}'$  that

$$|L_{\mathcal{G}}(h | g) - L_{\mathcal{S};R}(h | g)| \leq \Gamma_g(\delta, R, m, m').$$

429 Further, for all  $\gamma > 0$ , if  $m \geq \frac{16(\mathbb{P}_{D_g}(x \in R))^2}{\gamma^2} (2d \ln(8/\gamma) + \ln(8/\delta))$  and  $m' \geq \frac{2 \ln(4/\delta)}{\gamma^2}$ , then  
430  $\Gamma_g(\delta, R, m, m') < \gamma$ .

431 *Proof.* We begin with the case where both  $\mathbb{P}_{D_g}(x \in R) \neq 0$  and  $\mathbb{P}_{D_g}(x \in R^c) \neq 0$ . In this case,  
 432 we are able to draw unlabeled samples from both regions, and neither  $\mathcal{S}_{R,g}$  nor  $\mathcal{S}_{R^c,g}$  is  $\emptyset$ .

433 By a lemma of Vapnik [28], we have that with probability  $\geq 1 - \delta/2$  over the draw of  $m$  samples  
 434 from  $U_g(R)$  and their labeling via  $O_g(\cdot)$ , that simultaneously for each  $h \in \mathcal{H}'$ :

$$\left| L_{\mathcal{S}_{R,g}}(h) - \mathbb{P}_{D_g}(h(x) \neq y | x \in R) \right| \leq \frac{1}{m} + \sqrt{\frac{\ln(8/\delta) + d \ln(2em/d)}{m}}.$$

435 In  $R^c$ , all  $h \in \mathcal{H}'$  agree, and so estimating the conditional loss for each  $h \in \mathcal{H}'$  in this region is as  
 436 statistically hard as estimating a single Bernoulli parameter, which we do by arbitrarily choosing a  
 437 classifier to use for the loss estimate in this part of space. Thus, by definition of the two-part estimator  
 438 and Hoeffding's inequality [29], we have with probability  $\geq 1 - \delta/2$  for all  $h \in \mathcal{H}'$  simultaneously

$$\left| L_{\mathcal{S}_{R^c,g}}(h_{\mathcal{H}'}) - \mathbb{P}_{D_g}(h(x) \neq y | x \in R^c) \right| \leq \sqrt{\frac{\ln(4/\delta)}{2m'}}.$$

439 By a union bound, with probability  $\geq 1 - \delta$ , both of these events take place, and so for all  $h \in \mathcal{H}'$   
 440 simultaneously,

$$\begin{aligned} L_G(h | g) &= \mathbb{P}_{D_g}(h(x) \neq y | x \in R) \cdot \mathbb{P}_{D_g}(x \in R) \\ &\quad + \mathbb{P}_{D_g}(h(x) \neq y | x \in R^c) \cdot \mathbb{P}_{D_g}(x \in R^c) \\ &\leq \left( L_{\mathcal{S}_{R,g}}(h) + \sqrt{(\ln(8/\delta) + d \ln(2em/d)) / m} \right) \cdot \mathbb{P}_{D_g}(x \in R) \\ &\quad + \left( L_{\mathcal{S}_{R^c,g}}(h_{\mathcal{H}'}) + \sqrt{\ln(4/\delta) / 2m'} \right) \cdot \mathbb{P}_{D_g}(x \in R^c) \\ &\leq L_{\mathcal{S};R}(h | g) + \Gamma_g(\delta, R, m, m'). \end{aligned}$$

441 The lower bound leading to the absolute value is analogous. Vapnik [28] also tells us that for any  
 442  $\gamma' > 0$ , a sample of size  $m \geq \frac{4}{\gamma'^2} (2d \ln(4/\gamma') + \ln(8/\delta))$  is sufficient to yield

$$\sqrt{(\ln(8/\delta) + d \ln(2em/d)) / m} < \gamma'.$$

443 Let  $\gamma' = \gamma/2 \mathbb{P}_{D_g}(x \in R)$ . Thus, substituting for  $\gamma'$  and bounding the probability inside the natural  
 444 log above by 1,

$$m \geq \mathbb{P}_{D_g}(x \in R)^2 \frac{16}{\gamma^2} (2d \ln(8/\gamma) + \ln(8/\delta))$$

445 implies that

$$\frac{1}{m} + \sqrt{\frac{\ln(8/\delta) + d \ln(2em/d)}{m}} < \frac{\gamma}{2 \mathbb{P}_{D_g}(x \in R)}.$$

446 As a corollary to Hoeffding, if  $m' \geq 2 \ln(4/\delta) / \gamma^2$ , then  $\sqrt{\ln(4/\delta) / 2m'} < \gamma/2$ . Thus, we may  
 447 write

$$\Gamma_g(\delta, R, m, m') = \mathbb{P}_{D_g}(x \in R) \left( \frac{1}{m} + \sqrt{\frac{\ln(8/\delta) + d \ln(2em/d)}{m}} \right) + \sqrt{\frac{\ln(4/\delta)}{2m'}} < \gamma/2 + \gamma/2 = \gamma.$$

448 Now suppose that  $\mathbb{P}_{D_g}(x \in R^c) = 0$ . In this case, we have  $\mathcal{S}_{R^c,g} = \emptyset$ . Again, we have that with  
 449 probability  $\geq 1 - \delta/2$ ,

$$\left| L_{\mathcal{S}_{R,g}}(h) - \mathbb{P}_{D_g}(h(x) \neq y | x \in R) \right| \leq \frac{1}{m} + \sqrt{\frac{\ln(8/\delta) + d \ln(2em/d)}{m}}.$$

450 When  $\mathbb{P}_{D_g}(x \in R^c) = 0$ , it holds that  $\mathbb{P}_{D_g}(x \in R) = 1$ , and so

$$\begin{aligned} L_G(h | g) &= \mathbb{P}_{D_g}(h(x) \neq y | x \in R) \cdot \mathbb{P}_{D_g}(x \in R) \\ &\quad + \mathbb{P}_{D_g}(h(x) \neq y | x \in R^c) \cdot \mathbb{P}_{D_g}(x \in R^c) \\ &= \mathbb{P}_{D_g}(h(x) \neq y | x \in R) \\ &\leq L_{\mathcal{S}_{R,g}}(h) + \sqrt{(\ln(8/\delta) + d \ln(2em/d)) / m} \\ &= L_{\mathcal{S};R}(h | g) + \Gamma_g(\delta, R, m, m'), \end{aligned}$$

451 where the final equality comes from fact that  $\mathbb{P}_{D_g}(x \in R^c) = 0$  and  $\mathbb{P}_{D_g}(x \in R) = 1$ , as  
 452 well as the definitions of  $L_{S;R}(h | g)$  and  $\Gamma_g(\delta, R, m, m')$ . Similarly to the above, if we let  
 453  $\gamma' = \gamma/2\mathbb{P}_{D_g}(x \in R) = \gamma/2$ , then

$$m \geq \frac{16}{\gamma^2} (2d \ln(8/\gamma) + \ln(8/\delta))$$

implies that

$$\frac{1}{m} + \sqrt{\frac{\ln(8/\delta) + d \ln(2em/d)}{m}} < \frac{\gamma}{2},$$

454 which by the definition of  $\Gamma_g(\delta, R, m, m')$  when  $\mathbb{P}_{D_g}(x \in R^c) = 0$  gives us  $\Gamma_g(\delta, R, m, m') <$   
 455  $\gamma/2 < \gamma$ . The case where  $\mathbb{P}_{D_g}(x \in R) = 0$  follows the previous argument for when  $\mathbb{P}_{D_g}(x \in R^c) =$   
 456  $0$ .

457 □

458 **Definition 5.** Given a collection of group distributions  $\mathcal{G}$ , some  $\mathcal{H}' \subseteq \mathcal{H}$ , a hypothesis  $h \in \mathcal{H}'$ , some  
 459 subset  $R \subseteq \mathcal{X}$  measurable with respect to each marginal of  $D_g \in \mathcal{G}$ , and labeled samples  $\mathcal{S}_{R,k}$  and  
 460  $\mathcal{S}_{R^c,k}$ , we define the empirical estimate of the multi-group loss of  $h$  parameterized by  $R$  via

$$L_{S;R}^{\max}(h) := \max_{g \in [G]} L_{S;R}(h | g).$$

461 Having recalled the way in which we form empirical estimates for the group worst-case loss of a  
 462 given hypothesis, we can show a simple concentration lemma for this group worst-case loss estimator  
 463 using the concentration property for individual groups proved in Lemma 1,

464 **Lemma 2.** Fix  $\delta \in (0, 1)$ , a set of group distributions  $\mathcal{G}$ , a subset  $R \subseteq \mathcal{X}$  measurable with respect  
 465 to each marginal of  $D_g \in \mathcal{G}$ , and a set of classifiers  $\mathcal{H}' \subseteq \mathcal{H}$  that agree on  $R^c$ . Suppose for each  
 466  $g \in [G]$ , we query  $m_g > 0$  unlabeled samples from  $U_g(R)$ , and  $m'_g > 0$  samples from  $U_g(R^c)$ .  
 467 Suppose further that we label the outputs via calls to  $O_g(\cdot)$ , forming the labeled samples  $\mathcal{S}_{R,g}$  and  
 468  $\mathcal{S}_{R^c,g}$ , respectively, for each  $g \in [G]$ ; if  $\mathbb{P}_{D_g}(x \in R) = 0$  or  $\mathbb{P}_{D_g}(x \in R^c) = 0$ , then we set the  
 469 corresponding sample to be  $\emptyset$ . Then with probability  $\geq 1 - \delta$ , it holds for all  $h \in \mathcal{H}'$  that

$$|L_{\mathcal{G}}^{\max}(h) - L_{S;R}^{\max}(h)| \leq \max_{g' \in [G]} \Gamma_{g'}(\delta/G, m_{g'}, m'_{g'}).$$

470 *Proof.* By Lemma 1 and a union bound, it holds with probability  $\geq 1 - \delta$  that on all  $D_g$ , for all  
 471  $h \in \mathcal{H}'$  simultaneously, that

$$|L_{\mathcal{G}}(h | g) - L_{S;R}(h | g)| \leq \Gamma_g(\delta/G, m_g, m'_g).$$

472 Thus we may write

$$\begin{aligned} \left| L_{\mathcal{G}}^{\max}(h) - L_{S;R}^{\max}(h) \right| &= \left| \max_{g' \in [G]} L_{\mathcal{G}}(h | g') - \max_{g' \in [G]} L_{S;R}(h | g') \right| \\ &\leq \max_{g' \in [G]} |L_{\mathcal{G}}(h | g') - L_{S;R}(h | g')| \\ &\leq \max_{g' \in [G]} \Gamma_{g'}(\delta/G, m_{g'}, m'_{g'}). \end{aligned}$$

473 □

474 We now use Lemma 2 to show that Algorithm 1 is conservative enough that the optimal hypothesis  
 475  $h^*$  is never eliminated from contention throughout the run of the algorithm with high probability.

476 **Lemma 3.** Fix  $\delta \in (0, 1)$ , a collection of group distributions  $\mathcal{G}$ , and a hypothesis class  $\mathcal{H}$  with  
 477  $d < \infty$  arbitrarily. With probability  $\geq 1 - \delta$ , it holds after each iteration  $i$  of Algorithm 1 that  
 478  $h^* \in \mathcal{H}_{i+1}$ .

479 *Proof.* By Lemmas 1 and 2, and a union bound over iterations, the number of samples labeled at  
 480 each iteration is sufficient for us to conclude that with probability  $\geq 1 - \delta$ , for every iteration  $i$

481 and for each  $h \in \mathcal{H}_i$ , it holds that<sup>2</sup>

$$|L_{\mathcal{S};R_i}^{\max}(h) - L_{\mathcal{G}}^{\max}(h)| \leq 2^{I-i}\epsilon/8.$$

482 We give an inductive argument conditioned on this high probability event. When  $i = 1$ , we have  
 483  $h^* \in \mathcal{H}_1$  because  $\mathcal{H}_1 = \mathcal{H}$ , and  $h^* \in \mathcal{H}$  by definition. If  $h^* \in \mathcal{H}_i$  for  $i \geq 1$ , then  $h^* \in \mathcal{H}_{i+1}$  if and  
 484 only if

$$L_{\mathcal{S};R_i}^{\max}(h^*) \leq L_{\mathcal{S};R_i}^{\max}(\hat{h}_i) + 2^{I-i}\epsilon/4.$$

485 When for each  $h \in \mathcal{H}_i$ , it holds that  $|L_{\mathcal{S};R_i}^{\max}(h) - L_{\mathcal{G}}^{\max}(h)| \leq 2^{I-i}\epsilon/8$ , we may write

$$\begin{aligned} L_{\mathcal{S};R_i}^{\max}(h^*) - L_{\mathcal{S};R_i}^{\max}(\hat{h}_i) &\leq L_{\mathcal{S};R_i}^{\max}(h^*) - L_{\mathcal{G}}^{\max}(h^*) + L_{\mathcal{G}}^{\max}(\hat{h}_i) - L_{\mathcal{S};R_i}^{\max}(\hat{h}_i) \\ &\leq |L_{\mathcal{S};R_i}^{\max}(h^*) - L_{\mathcal{G}}^{\max}(h^*)| + |L_{\mathcal{G}}^{\max}(\hat{h}_i) - L_{\mathcal{S};R_i}^{\max}(\hat{h}_i)| \\ &\leq 2^{I-i}\epsilon/8 + 2^{I-i}\epsilon/8 \\ &= 2^{I-i}\epsilon/4, \end{aligned}$$

486 where the first inequality comes from the optimality of  $h^*$ . Thus, we must have  $h \in \mathcal{H}_{i+1}$ .  $\square$

487 Now, using the fact that the optimal hypothesis stays in contention throughout the run of the algorithm,  
 488 we can give a guarantee on the true error of each hypothesis  $h \in \mathcal{H}_{i+1}$ . The idea is that using  
 489 concentration and the small empirical error of each  $h \in \mathcal{H}_{i+1}$ , we can say that the true errors of each  
 490  $h \in \mathcal{H}_{i+1}$  are similar to the true errors of the ERM hypothesis  $\hat{h}_i$ , and then use the true error of  $\hat{h}_i$  as  
 491 a reference point to which we can compare the true error of  $h \in \mathcal{H}_{i+1}$  and  $h^*$ .

492 **Lemma 4.** Fix  $\delta \in (0, 1)$ , a collection of group distributions  $\mathcal{G}$ , and a hypothesis class  $\mathcal{H}$  with  
 493  $d < \infty$  arbitrarily. Then with probability  $\geq 1 - \delta$ , after every iteration  $i$  of Algorithm 1, it holds for  
 494 all  $h \in \mathcal{H}_{i+1}$  that

$$|L_{\mathcal{G}}^{\max}(h) - L_{\mathcal{G}}^{\max}(h^*)| \leq 2^{I-i}\epsilon.$$

495 *Proof.* If  $h \in \mathcal{H}_{i+1}$ , then by the specification of the algorithm, it holds that

$$L_{\mathcal{S};R_i}^{\max}(h) - L_{\mathcal{S};R_i}^{\max}(\hat{h}_i) \leq 2^{I-i}\epsilon/4.$$

496 Because  $\hat{h}_i$  is the ERM hypothesis at iteration  $i$ , it holds that  $L_{\mathcal{S};R_i}^{\max}(\hat{h}_i) - L_{\mathcal{S};R_i}^{\max}(h) \leq 0 < 2^{I-i}\epsilon/4$ ,  
 497 and thus we may conclude

$$|L_{\mathcal{S};R_i}^{\max}(h) - L_{\mathcal{S};R_i}^{\max}(\hat{h}_i)| \leq 2^{I-i}\epsilon/4.$$

498 By Lemma 2 and the number of samples labeled at each iteration, with probability  $\geq 1 - \delta$ , it holds  
 499 for all iterations and for all  $h \in \mathcal{H}_i$  that

$$|L_{\mathcal{S};R_i}^{\max}(h) - L_{\mathcal{G}}^{\max}(h)| \leq 2^{I-i}\epsilon/8.$$

500 Conditioned on this event, if  $h \in \mathcal{H}_{i+1}$ , we have

$$\begin{aligned} |L_{\mathcal{G}}^{\max}(h) - L_{\mathcal{G}}^{\max}(\hat{h}_i)| &= |L_{\mathcal{G}}^{\max}(h) - L_{\mathcal{S};R_i}^{\max}(h) + L_{\mathcal{S};R_i}^{\max}(h) - L_{\mathcal{S};R_i}^{\max}(\hat{h}_i) + L_{\mathcal{S};R_i}^{\max}(\hat{h}_i) - L_{\mathcal{G}}^{\max}(\hat{h}_i)| \\ &\leq |L_{\mathcal{G}}^{\max}(h) - L_{\mathcal{S};R_i}^{\max}(h)| + |L_{\mathcal{S};R_i}^{\max}(h) - L_{\mathcal{S};R_i}^{\max}(\hat{h}_i)| + |L_{\mathcal{S};R_i}^{\max}(\hat{h}_i) - L_{\mathcal{G}}^{\max}(\hat{h}_i)| \\ &\leq 2^{I-i}\epsilon/8 + 2^{I-i}\epsilon/4 + 2^{I-i}\epsilon/8 \\ &= 2^{I-i}\epsilon/2. \end{aligned}$$

501 By Lemma 3, it holds that  $h^* \in \mathcal{H}_{i+1}$  whenever  $|L_{\mathcal{S};R_i}^{\max}(h) - L_{\mathcal{G}}^{\max}(h)| \leq 2^{I-i}\epsilon/8$  for all  $h \in \mathcal{H}_i$  at  
 502 all iterations. Thus, this bound on the true error difference with the ERM  $\hat{h}_i$  applies to  $h^*$ , and we  
 503 may write for arbitrary  $h \in \mathcal{H}_{i+1}$  that

$$|L_{\mathcal{G}}^{\max}(h) - L_{\mathcal{G}}^{\max}(h^*)| \leq |L_{\mathcal{G}}^{\max}(h) - L_{\mathcal{G}}^{\max}(\hat{h}_i)| + |L_{\mathcal{G}}^{\max}(\hat{h}_i) - L_{\mathcal{G}}^{\max}(h^*)| \leq 2^{I-i}\epsilon,$$

504 which is the desired result.  $\square$

<sup>2</sup>We do not directly apply Lemma 1 with  $\gamma = \epsilon 2^{I-i}/8$  here. We use this quantity in the outer dependence on  $\gamma$  of Lemma 1, but for the natural log dependence on  $\gamma$ , we sub in  $\epsilon/8$  to simplify the analysis. Thus we take slightly more samples than Lemma 1 directly suggests. Because we take the largest probability of the disagreement region over groups as  $m_i$ , it holds that  $m_g$  is at the smallest the sample size suggested by Lemma 1 for each  $g$ .

505 **Definition 6.** Given a group distribution  $D_g \in \mathcal{G}$ , a hypothesis  $h \in \mathcal{H}$ , and a radius  $r \geq 0$ , let the  
 506 “ $D_g$  - disagreement ball in  $\mathcal{H}$  of radius  $r$  about  $h$ ” be

$$B_g(h, r) := \{h' \in \mathcal{H} : \rho_g(h, h') \leq r\},$$

507 where  $\rho_g(h, h') := \mathbb{P}_{D_g}(h(x) \neq h'(x))$ .

508 **Definition 7.** Given a group distribution  $D_g \in \mathcal{G}$  and a hypothesis class  $\mathcal{H}$ , let the “disagreement  
 509 coefficient” of  $D_g$  be defined as

$$\theta_g := \sup_{h \in \mathcal{H}} \sup_{r' \geq 2\nu + \epsilon} \frac{\mathbb{P}_{D_g}(x \in \Delta(B_g(h, r')))}{r'}.$$

510 We further define the disagreement coefficient over a collection of group distributions  $\mathcal{G}$  as

$$\theta_{\mathcal{G}} := \max_{g' \in [G]} \theta_{g'}.$$

511 Given these definitions, we are now ready to state the main theorem. The consistency comes from  
 512 what we showed in Lemma 4: as the true error for each  $h \in \mathcal{H}_{i+1}$  decreases with each iteration, after  
 513 enough iterations we will have each  $h \in \mathcal{H}_{i+1}$  having  $\epsilon$ -optimality.

514 The label complexity bound follows standard ideas in the DBAL literature; see for example [9, 24].  
 515 Essentially, what we do is show that at each iteration  $i$ , because the true error of any  $h \in \mathcal{H}_i$  on the  
 516 multi-group objective can't be too large, the disagreement of  $h$  and  $h^*$  on any single group cannot be  
 517 too large. This leads to a bound on the size of the disagreement region for each  $g$ .

518 **Theorem 4.** For all  $\epsilon > 0$ ,  $\delta \in (0, 1)$ , collections of group distributions  $\mathcal{G}$ , and hypothesis classes  $\mathcal{H}$   
 519 with  $d < \infty$ , with probability  $\geq 1 - \delta$ , the output  $\hat{h}$  of Algorithm 1 satisfies

$$L_{\mathcal{G}}^{\max}(\hat{h}) \leq L_{\mathcal{G}}^{\max}(h^*) + \epsilon,$$

520 and its label complexity is bounded by

$$\tilde{O}\left(G \theta_{\mathcal{G}}^2 \left(\frac{\nu^2}{\epsilon^2} + 1\right) (d \log(1/\epsilon) + \log(1/\delta)) \log(1/\epsilon) + \frac{G \log(1/\epsilon) \log(1/\delta)}{\epsilon^2}\right).$$

521 *Proof.* Lemma 4 says that the number of samples drawn at each iteration is sufficiently large  
 522 that with probability  $\geq 1 - \delta$ , for all  $i \in [I]$ , it holds that for all  $h \in \mathcal{H}_{i+1}$ , that we have  
 523  $|L_{\mathcal{G}}^{\max}(h) - L_{\mathcal{G}}^{\max}(h^*)| \leq 2^{I-i}\epsilon$ . Thus, after  $I = \lceil \log(1/\epsilon) \rceil$  iterations, the output  $\hat{h}$  satisfies  
 524 the consistency condition.

525 To see the label complexity, which is the sum of the number of labels we query at each iteration, we  
 526 note at iteration  $i$ , we label no more than

$$1024 \left(\frac{m_i}{\epsilon^{2^{I-i}}}\right)^2 \left(2d \log\left(\frac{64}{\epsilon}\right) + \ln\left(\frac{8G \lceil \log(1/\epsilon) \rceil}{\delta}\right)\right) + \frac{128 \ln(4G \lceil \log(1/\epsilon) \rceil / \delta)}{\epsilon^2}$$

527 samples for each group distribution  $D_g$ , where  $m_i = \max_{g'} \mathbb{P}_{D_{g'}}(x \in \Delta(\mathcal{H}_i))$ . The only term  
 528 here that depends on  $i$  is  $\frac{m_i}{\epsilon^{2^{I-i}}}$ . By Lemma 4, with probability  $\geq 1 - \delta$ , it holds for each  $i > 1$   
 529 that  $|L_{\mathcal{G}}^{\max}(h) - L_{\mathcal{G}}^{\max}(h^*)| \leq 2^{I-i+1}\epsilon$ ; this holds automatically at  $i = 1$  by the setting of  $I =$   
 530  $\lceil \log(1/\epsilon) \rceil$ . Thus, at arbitrary  $i$  and for arbitrary  $g \in [G]$ , we may write

$$\begin{aligned} \rho_g(h, h^*) &= \mathbb{P}_{D_g}(h(x) \neq h^*(x)) \\ &= \mathbb{P}_{D_g}(h(x) \neq y, h^*(x) = y) + \mathbb{P}_{D_g}(h(x) = y, h^*(x) \neq y) \\ &\leq \mathbb{P}_{D_g}(h(x) \neq y) + \mathbb{P}_{D_g}(h^*(x) \neq y) \\ &= L_{\mathcal{G}}(h | g) + L_{\mathcal{G}}(h^* | g) \\ &\leq L_{\mathcal{G}}^{\max}(h) + L_{\mathcal{G}}^{\max}(h^*) \\ &= L_{\mathcal{G}}^{\max}(h) - L_{\mathcal{G}}^{\max}(h^*) + L_{\mathcal{G}}^{\max}(h^*) + L_{\mathcal{G}}^{\max}(h^*) \\ &\leq 2^{I-i+1}\epsilon + 2\nu, \end{aligned}$$

531 where we recall  $\nu$  is the noise rate on the multi-group objective. Thus, with probability  $\geq 1 - \delta$ , for  
 532 each  $i \in I$  and  $g \in [G]$ , it holds that

$$\mathcal{H}_i \subseteq B_g(h^*, 2^{I-i+1}\epsilon + 2\nu).$$

533 Given this observation, we may then write, for all  $g$ , that

$$\mathbb{P}_{D_g}(x \in \Delta(\mathcal{H}_i)) \leq \mathbb{P}_{D_g}(x \in \Delta(B_k(h^*, 2\nu + 2^{I-i+1}\epsilon))),$$

534 as if there are  $h, h' \in \mathcal{H}_i$  that disagree on some  $x$ , we have  $h, h' \in B_g(h^*, 2\nu + 2^{I-i+1}\epsilon)$ , and so  
 535  $h, h'$  also realize disagreement on  $x$  for the larger set of classifiers. Recalling the definition of  $m_i$ ,  
 536 this allows us to bound the sum of terms depending on  $i$  for each distribution  $D_g$  as

$$\begin{aligned} \sum_{i=1}^I \left( \frac{m_i}{\epsilon 2^{I-i}} \right)^2 &\leq \sum_{i=1}^I \left( \frac{\max_{g'} \mathbb{P}_{D_g}(x \in \Delta(B_{g'}(h^*, 2\nu + 2^{I-i+1}\epsilon)))}{2^{I-i}\epsilon} \right)^2 \\ &\leq \sum_{i=1}^I \left( \max_{g'} \frac{\mathbb{P}_{D_g}(x \in \Delta(B_{g'}(h^*, 2\nu + 2^{I-i+1}\epsilon)))}{2\nu + 2^{I-i+1}\epsilon} \cdot \frac{2\nu + 2^{I-i+1}\epsilon}{2^{I-i}\epsilon} \right)^2 \\ &\leq 4 \left( \frac{\nu + \epsilon}{\epsilon} \right)^2 \sum_{i=1}^I \left( \max_{g'} \frac{\mathbb{P}_{D_g}(x \in \Delta(B_{g'}(h^*, 2\nu + 2^{I-i+1}\epsilon)))}{2\nu + 2^{I-i+1}\epsilon} \right)^2 \\ &\leq 4 \left( \frac{\nu + \epsilon}{\epsilon} \right)^2 \sum_{i=1}^I \left( \max_{g'} \sup_{h \in \mathcal{H}} \sup_{r \geq 2\nu + \epsilon} \frac{\mathbb{P}_{D_g}(x \in \Delta(B_{k'}(h, r)))}{r} \right)^2 \\ &= 4 \lceil \log(1/\epsilon) \rceil \left( \frac{\nu + \epsilon}{\epsilon} \right)^2 \left( \max_{g'} \theta_{g'} \right)^2 \\ &= 4 \lceil \log(1/\epsilon) \rceil \left( \frac{\nu + \epsilon}{\epsilon} \right)^2 \theta_{\mathcal{G}}^2. \end{aligned}$$

537 The label complexity bound then follows by noting the algorithm labels the same amount of samples  
 538 for all  $G$  groups each iteration, and ignoring the factors of  $\log(G)$  and  $\log(\log(1/\epsilon))$ .  $\square$

## 539 9.2 Group-Realizable Guarantees

540 **Theorem 5.** *Suppose Algorithm 2 is run with the active learner  $\mathcal{A}_{CAL}$  of [26]. Then for all  $\epsilon > 0$ ,*  
 541  *$\delta \in (0, 1)$ , hypothesis classes  $\mathcal{H}$  with  $d < \infty$ , and collections of group distributions  $\mathcal{G}$  that are group*  
 542 *realizable with respect to  $\mathcal{H}$ , with probability  $\geq 1 - \delta$ , the output  $\hat{h}$  satisfies*

$$L_{\mathcal{G}}^{\max}(\hat{h}) \leq L_{\mathcal{G}}^{\max}(h^*) + \epsilon,$$

543 and the number of labels requested is

$$\tilde{O}\left(dG\theta_{\mathcal{G}} \log(1/\epsilon)\right).$$

544 *Proof.* The label complexity follows directly from the guarantees given in [15]. By a union bound,  
 545 we with probability  $\geq 1 - \delta$ , have that for all  $g \in [G]$ , that  $\mathcal{A}_{CAL}$  returns  $\hat{h}_g$  with the property that

$$L_{\mathcal{G}}(\hat{h}_g | g) \leq \epsilon/6.$$

546 Fix some  $g \in [G]$  arbitrarily. Consider a counterfactual training set  $S_g$ , unseen by the learner,  
 547 constructed by labeling each example  $x \in S'_g$  via the oracle call  $O_g(x)$ . Then Vapnik [28] tells us  
 548 that  $m_g := |S'_g|$  is sufficiently large that with probability  $\geq 1 - \delta/2$ , for each  $h \in \mathcal{H}$  simultaneously,  
 549 we have

$$|L_{\mathcal{G}}(h | g) - L_{S'_g}(h)| < \epsilon/6.$$

550 Again by the union bound, this uniform convergence on  $S_g$  and the guarantee on the runs of  $\mathcal{A}_{CAL}$   
 551 both hold for each  $g \in [G]$ . Conditioned on this high probability event, we can first note that for  
 552 some arbitrary  $h \in \mathcal{H}$ ,

$$\begin{aligned}
 \left| L_{S_g}(h) - L_{\hat{S}_g}(h) \right| &= \left| \frac{1}{m_g} \sum_{i=1}^{m_g} \mathbb{1}[h(x_i) \neq y_i] - \mathbb{1}[h(x_i) \neq \hat{h}_g(x_i)] \right| \\
 &\leq \frac{1}{m_g} \sum_{i=1}^{m_g} \left| \mathbb{1}[h(x_i) \neq y_i] - \mathbb{1}[h(x_i) \neq \hat{h}_g(x_i)] \right| \\
 &\leq \frac{1}{m_g} \sum_{i=1}^{m_g} \mathbb{1}[y_i \neq \hat{h}_g(x_i)] \\
 &= L_{S_g}(\hat{h}_g) \\
 &\leq L_{\mathcal{G}}(\hat{h}_g) + \epsilon/6 \\
 &\leq \epsilon/6 + \epsilon/6 \\
 &= \epsilon/3,
 \end{aligned}$$

553 where the final equality comes from the success of the runs of  $\mathcal{A}_{CAL}$ . Then for arbitrary  $h$ , combining  
 554 Vapnik's guarantee and the inequality we just showed, we may write:

$$\begin{aligned}
 \left| L_{\mathcal{G}}(h | g) - L_{\hat{S}_g}(h) \right| &= \left| L_{\mathcal{G}}(h | g) - L_{S_g}(h) + L_{S_g}(h) - L_{\hat{S}_g}(h) \right| \\
 &\leq \left| L_{\mathcal{G}}(h | g) - L_{S_g}(h) \right| + \left| L_{S_g}(h) - L_{\hat{S}_g}(h) \right| \\
 &< \epsilon/6 + \epsilon/3 \\
 &= \epsilon/2.
 \end{aligned}$$

555 Given this guarantee on the representativeness of the artificially labeled samples on each group  $g$ , we  
 556 have a guarantee for the representativeness over the worst case. For arbitrarily  $h \in \mathcal{H}$ , we may write

$$\begin{aligned}
 \left| L_{\mathcal{G}}^{\max}(h) - \max_{g \in [G]} L_{\hat{S}_g}(h) \right| &= \left| \max_{g \in [G]} L_{\mathcal{G}}(h | g) - \max_{g \in [G]} L_{\hat{S}_g}(h) \right| \\
 &\leq \max_{g \in [G]} \left| L_{\mathcal{G}}(h | g) - L_{\hat{S}_g}(h) \right| \\
 &\leq \epsilon/2.
 \end{aligned}$$

557 Thus, by the fact that  $\hat{h}$  is the ERM, we have

$$L_{\mathcal{G}}^{\max}(\hat{h}) \leq \max_{g \in [G]} L_{\hat{S}_g}(\hat{h}) + \epsilon/2 \leq \max_{g \in [G]} L_{\hat{S}_g}(h^*) + \epsilon/2 \leq L_{\mathcal{G}}^{\max}(h^*) + \epsilon.$$

558 □

### 559 9.3 Approximation Guarantees

560 **Theorem 6.** *Suppose Algorithm 3 is run with the active learner  $\mathcal{A}_{DHM}$  of [15]. Then for all  $\epsilon > 0$ ,*  
 561  *$\delta \in (0, 1)$ , hypothesis classes  $\mathcal{H}$  with  $d < \infty$ , and collections of groups  $\mathcal{D}$ , with probability  $\geq 1 - \delta$ ,*  
 562 *the output  $\hat{h}$  satisfies*

$$L_{\mathcal{G}}^{\max}(\hat{h}) \leq L_{\mathcal{G}}^{\max}(h^*) + 2 \cdot \max_{g \in [G]} \nu_g + \epsilon \leq 3 \cdot L_{\mathcal{G}}^{\max}(h^*) + \epsilon,$$

563 and the number of labels requested is

$$\tilde{O} \left( dG\theta_{\mathcal{G}} \left( \log^2(1/\epsilon) + \frac{\nu^2}{\epsilon^2} \right) \right).$$

564 *Proof.* The proof is almost identical to that of Theorem 2. The label complexity bound follows  
 565 directly from [10]. Similar to before, we have that for all  $g \in [G]$ ,  $\mathcal{A}_{DHM}$  returns  $\hat{h}_g$  with the  
 566 property that

$$L_{\mathcal{G}}(\hat{h}_g | g) \leq L_{\mathcal{G}}(h_g^* | g) + \epsilon/6.$$

567 Fix some  $g \in [G]$  arbitrarily. On a counterfactual training set  $S_g$ , unseen by the learner, constructed  
 568 by labeling each example  $x \in S'_g$  via the oracle call  $O_g(x)$ , it holds that  $m_g := |S'_g|$  is sufficiently  
 569 large that with probability  $\geq 1 - \delta/2$ , for each  $h \in \mathcal{H}$  simultaneously, we have

$$|L_{\mathcal{G}}(h | g) - L_{S_g}(h)| < \epsilon/6.$$

570 By the union bound, this uniform convergence and the guarantee on the runs of  $\mathcal{A}_{DHM}$  both hold.  
 571 Thus, we can first note that for some arbitrary  $h \in \mathcal{H}$ ,

$$\begin{aligned} |L_{S_g}(h) - L_{\hat{S}_g}(h)| &= \left| \frac{1}{m_g} \sum_{i=1}^{m_g} \mathbb{1}[h(x_i) \neq y_i] - \mathbb{1}[h(x_i) \neq \hat{h}_g(x_i)] \right| \\ &\leq \frac{1}{m_g} \sum_{i=1}^{m_g} \left| \mathbb{1}[h(x_i) \neq y_i] - \mathbb{1}[h(x_i) \neq \hat{h}_g(x_i)] \right| \\ &\leq \frac{1}{m_g} \sum_{i=1}^{m_g} \mathbb{1}[y_i \neq \hat{h}_g(x_i)] \\ &= L_{S_g}(\hat{h}_g) \\ &\leq L_{\mathcal{G}}(\hat{h}_g | g) + \epsilon/6 \\ &\leq L_{\mathcal{G}}(h_g^* | g) + \epsilon/3 \\ &= \nu_g + \epsilon/3. \end{aligned}$$

572 where the second to last inequality comes from uniform convergence over  $S_g$ , and the final equality  
 573 comes from the correctness guarantee of  $\mathcal{A}_{DHM}$ . Then for arbitrary  $h$ , combining Vapnik's guarantee  
 574 and the inequality we just showed, we may write:

$$\begin{aligned} |L_{\mathcal{G}}(h | g) - L_{\hat{S}_g}(h)| &= |L_{\mathcal{G}}(h | g) - L_{S_g}(h) + L_{S_g}(h) - L_{\hat{S}_g}(h)| \\ &\leq |L_{\mathcal{G}}(h | g) - L_{S_g}(h)| + |L_{S_g}(h) - L_{\hat{S}_g}(h)| \\ &< \epsilon/6 + \nu_g + \epsilon/3 \\ &= \nu_g + \epsilon/2. \end{aligned}$$

575 Then, as above, we have, for arbitrarily  $h \in \mathcal{H}$ ,

$$\left| L_{\mathcal{G}}^{\max}(h) - \max_{g \in [G]} L_{\hat{S}_g}(h) \right| \leq \max_{g \in [G]} |L_{\mathcal{G}}(h | g) - L_{\hat{S}_g}(h)| \leq \max_{g \in [G]} \nu_g + \epsilon/2 \leq \nu + \epsilon/2,$$

576 where the the final inequality comes from the fact that if any hypothesis has less than  $\nu_g$  error on all  
 577 groups, it would be optimal on group  $g$ . Thus, by the fact that  $\hat{h}$  is the ERM, we have

$$L_{\mathcal{G}}^{\max}(\hat{h}) \leq \max_{g \in [G]} L_{\hat{S}_g}(\hat{h}) + \nu_g + \epsilon/2 \leq \max_{g \in [G]} L_{\hat{S}_g}(h^*) + \nu_g + \epsilon/2 \leq L_{\mathcal{G}}^{\max}(h^*) + 2\nu + \epsilon \leq 3 \cdot L_{\mathcal{G}}^{\max}(h^*) + \epsilon$$

578 □
